# The evolution of ovary-specific gene expression in Hawaiian *Drosophilidae*

Samuel H. Church<sup>1,2,\*</sup>      Catriona Munro<sup>3</sup>      Casey W. Dunn<sup>2</sup>  
Cassandra G. Extavour<sup>1,4,5</sup>

<sup>1</sup> Department of Organismic and Evolutionary Biology, Harvard University, Cambridge, MA 02138, USA

<sup>2</sup> Current address: Department of Ecology and Evolutionary Biology, Yale University, New Haven, CT 06520, USA

<sup>3</sup> Collège de France, PSL Research University, CNRS, Inserm, Center for Interdisciplinary Research in Biology, 75005 Paris, France

<sup>4</sup> Department of Molecular and Cellular Biology, Harvard University, Cambridge, MA 02138, USA

<sup>5</sup> Howard Hughes Medical Institute, Chevy Chase, MD 20815

\* corresponding author: samuelhchurch@gmail.com

## 1 Abstract

As detailed data on gene expression become accessible from more species, we have an opportunity to test the extent to which our understanding of developmental genetics from model organisms helps predict expression patterns across species. Central to this is the question: how much variation in gene expression do we expect to observe between species? Here we provide an answer by comparing RNAseq data between twelve species of Hawaiian *Drosophilidae* flies, focusing on gene expression differences between the ovary and other tissues. We show that there exists a cohort of ovary-specific genes that is stable across species, and that largely corresponds to described expression patterns from laboratory model *Drosophila* species. However, our results also show that, as phylogenetic distance increases, variation between species overwhelms variation between tissues. Using ancestral state reconstruction of expression, we describe the distribution of evolutionary changes in tissue-biased expression profiles, and use this to identify gains and losses of ovarian expression across these twelve species. We then use this distribution to calculate the correlation in expression evolution between genes, and demonstrate that genes with known interactions in *D. melanogaster* are significantly more correlated in their evolution than genes with no or unknown interactions. Finally, we use this correlation matrix to infer new networks of genes that have similar evolutionary trajectories, and we provide these as a dataset of novel testable hypotheses about genetic roles and interactions.

## 2 Introduction

Data on when and where genes are expressed are now fundamental to the study of development and disease<sup>1</sup>. With continually advancing RNA sequencing technologies, these data have been collected using RNA sequencing from a wide variety of cells, treatments and species<sup>2,3</sup>. Statistical analysis of gene expression across these differentials generates insights into how gene expression is connected to phenotypic differences in morphology and behavior<sup>4</sup>. However, when comparing gene expression across species, most studies have been restricted to pairwise comparisons, often between one model laboratory species and one other species of interest<sup>5</sup>. One challenge with such pairwise comparisons is that they lack robust information about how much evolutionary variation in expression we expect to observe, making it difficult to evaluate the significance of any inter-specific difference in variation<sup>5,6</sup>. Instead, we need phylogenetic comparisons of expression that take into account the shared history between species<sup>7,8</sup>, and that describe significant changes in expression in relation to other phenotypic traits of interest.<sup>9</sup> In this study we perform a phylogenetic comparison of gene expression across the organs of twelve species of Hawaiian Drosophilidae flies with highly divergent ovary and egg morphologies. From our results we identify individual genes that have undergone significant evolutionary shifts in organ-specific expression, and describe global patterns in transcriptome variation across species that can serve as a benchmark for future interspecific comparisons of gene expression.

Phylogenetic comparisons of developmental traits are particularly valuable for building context around comparisons between well-studied model organisms and their non-model relatives<sup>10</sup>. Much more has been learned about the genetics and development of laboratory model species like *D. melanogaster* than may ever be possible for the vast majority of life<sup>11</sup>. But the usefulness of model species to understand general principles depends in part on the extent to which biology in these species reflects the biology of other taxa, rather than species-specific phenomena<sup>12</sup>. In the case of gene expression, there has been substantial debate about the degree to which patterns observed in model organisms may be representative across species<sup>13–16</sup>. Where several studies showed that the expression profiles of organs within a species are more different the profiles of homologous organs across species<sup>17–20</sup>, other work has questioned this finding<sup>13,14</sup>. More recently, Breschi and colleagues (2016)<sup>21</sup> demonstrated that, consistent with an evolutionary model of trait evolution, species-level variation in gene expression increases with the time since divergence from the most recent common ancestor. In addition, previous work by authors on this manuscript<sup>8</sup> showed that, while expression patterns across tissues tend to be consistent between species, lineage-specific shifts in expression enrichment can be identified by applying phylogenetic comparative methods. With the exception of the work by Munro and colleagues (2021)<sup>8</sup>, these studies have been, to our knowledge, performed almost exclusively in vertebrate species<sup>17,18,20</sup>, and for the most part placental mammals<sup>13,14,16</sup>, meaning that far less is known about organ and species-level expression differences when comparing across the tree of life.

The detailed atlases of expression data across organs<sup>22</sup> and developmental timepoints<sup>23</sup> is one of the strengths of model systems like *D. melanogaster*. These public resources make it possible to explore global patterns of expression to gain insight into potential gene regulation, interaction, and function<sup>23–25</sup>. As atlases such as these have become increasingly detailed and available from more taxa, a new goal has been to compare these expression profiles across species<sup>7,26,27</sup>. One objective of these cross-species comparisons is to shed light on potential regulatory associations between genes<sup>7,9</sup>. This is especially advantageous for complex processes such as ovarian function for which we have a fragmented understanding of gene regulation despite genetic and transcriptome studies within single model organisms. Another objective of phylogenetic comparisons of expression atlases is to estimate the evolutionary distance between species at which we might expect a given gene to demonstrate a divergent pattern of expression<sup>6</sup>. If this distance is relatively small, then we predict atlases to contain large amounts of species-specific patterns. Alternatively, if as described above, variation across tissues outweighs variation across the species being compared, we predict atlases to contain large cohorts of tissue-specific genes that have been evolutionarily conserved. In this study we test for the existence of a core suite of ovary-specific genes across species of Hawaiian Drosophilidae and describe its size and composition in relation to the described atlas of expression in *D. melanogaster*.

The *Drosophila* ovary has several features<sup>28</sup> that make it a compelling organ in which to test hypotheses about expression evolution. Analyses of the FlyAtlas2 dataset<sup>29</sup> show that in *D. melanogaster*, more genes demonstrate highest expression enrichment in the ovary than any other adult organ (Fig. S1). Additionally,

80 all described signaling pathways are known to have a role in regulating ovarian development<sup>30</sup>. The ovary  
81 performs several critical functions, including maintaining the germ line and manufacturing specialized egg  
82 cells, yolk, and egg-shell materials<sup>31</sup>. Genetic screens<sup>30,32</sup> and experimental manipulation in *D. melanogaster*  
83 have revealed functions of many genes involved in these processes, including yolk-protein genes required  
84 for oogenesis<sup>33</sup> and embryonic patterning genes with localized mRNA like *nanos*<sup>34</sup> and *swallow*<sup>35</sup>. Here  
85 we compare whole-ovary RNA profiles to assess the extent to which these genes and others demonstrate  
86 consistent patterns of ovary-enrichment over evolutionary timescales in a clade with highly divergent ovary  
87 and egg morphologies.

88 The Hawaiian Drosophilidae clade contains an estimated 1,000 extant species<sup>36</sup> that diverged from a common  
89 ancestor with *D. melanogaster* between 25 and 40 million years ago<sup>37</sup>. Extant species have been studied  
90 in particular for the variation in ovary and egg morphology<sup>38,39</sup>. Species of Hawaiian Drosophilidae show  
91 the largest range within the family of egg size, shape, and the number of egg-producing units in the ovary,  
92 known as ovarioles<sup>40-42</sup>. Previous studies by our research group and others have shown that these traits are  
93 likely associated with evolutionary changes in the egg-laying substrate (e.g. rotting bark, flowers, leaves)<sup>38,40</sup>.  
94 Furthermore, our previous work demonstrated that at least one developmental process, governing how the  
95 number of ovarioles is specified in the adult *D. melanogaster* ovary, is conserved in Hawaiian *Drosophila*<sup>40</sup>.  
96 The diversity of Hawaiian species and their relationship to model species make them a strong candidate  
97 model clade for evo-devo research<sup>36,43</sup>. However, their relatively long generation times and species-specific  
98 breeding requirements make laboratory culture more challenging than classic *Drosophila* models<sup>36</sup>. In this  
99 study we leverage technologies that can be deployed on wild-caught individuals to gather rich developmental  
100 data to compare across species.

101 We compared the expression profiles of twelve species of wild-caught Hawaiian Drosophilidae species across  
102 three tissues: the adult ovary, head, and the remaining carcass (Fig. 1). First, we characterized the  
103 differentially expressed genes in the ovary of each species individually. By comparing these to each other,  
104 and to records of ovary-enriched genes from *D. melanogaster*, we identified a core suite of ovary genes shared  
105 across species. We then repeated this analysis for head-enriched genes, and compared the results across  
106 these parallel analyses to test the extent to which global patterns of expression difference are influenced  
107 by the identity of the tissues in question. We applied linear modeling to this dataset to test the overall  
108 contribution of species- and tissue-level differences to expression variation across genes, and describe the  
109 circumstances under which one is likely to dominate over the other. Finally, we used a phylogenetic analysis  
110 of expression changes over evolutionary time to identify genes likely to have gained and lost tissue-enriched  
111 expression. This evolutionary screen of expression changes allowed us to identify networks of genes that  
112 demonstrate correlated changes in expression evolution. We provide these networks as a searchable dataset  
113 of novel, testable hypotheses for gene regulation with respect to ovarian function. The results of this study  
114 demonstrate both the power of Hawaiian *Drosophila* as a model clade for evo-devo, and the potential of using  
115 phylogenetic methods to identify evolutionary variation in gene expression underlying phenotypic differences.

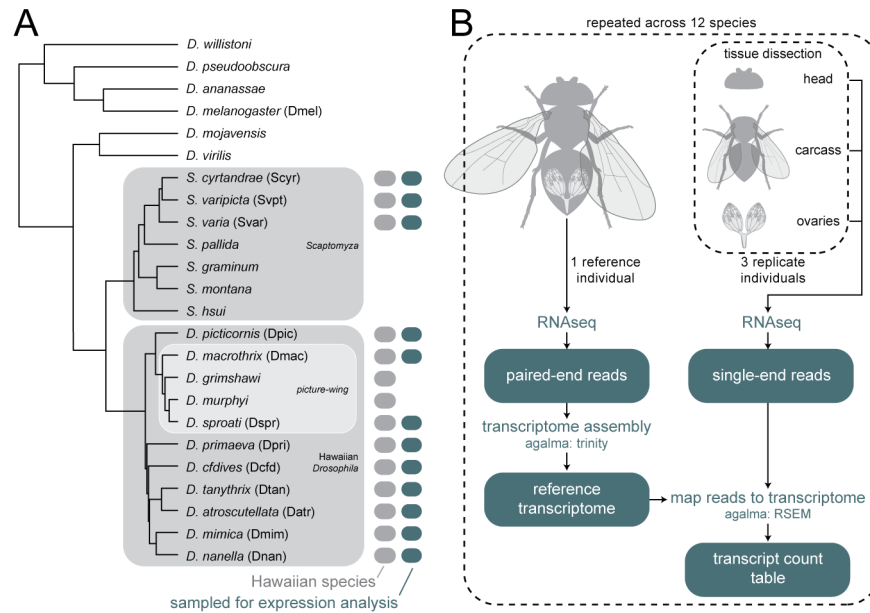

Figure 1: **Phylogeny of species and RNA sampling strategy.** A, Twelve species of Hawaiian Drosophilidae flies were collected in the wild and processed for RNA sequencing. The twelve reference transcriptomes assembled from these species were combined with twelve published genomes to generate the phylogeny shown here (originally published in Church and Extavour, 2021<sup>44</sup>). Three clades within the group are highlighted: the genus *Scaptomyza*, nested within the paraphyletic genus *Drosophila*; the Hawaiian *Drosophila*, which, along with *Scaptomyza*, make up the Hawaiian Drosophilidae; and the well-known *picture-wing* clade. Adjacent to tip labels are four letter species codes used throughout the manuscript. B, The experimental design used to generate the data in this manuscript. When sufficient specimens were available per species, one individual was used as a reference and three individuals were dissected into three separate tissues: the head, ovaries, and all remaining material (carcass). Reference individuals were sequenced to generate paired-end RNA reads and tissues were sequenced to generate single-end RNA reads. Tissue libraries were then mapped to the assembled reference to quantify transcript expression. Teal boxes indicate data files. Dashed-line boxes indicate a repeated step.

## 116 3 Methods

### 117 3.1 Field collection

118 Specimens used for transcriptome sampling were caught on the Hawaiian islands between May of 2016 and  
 119 May of 2017. Specimens were caught using a combination of net sweeping and fermented banana-mushroom  
 120 baits in various field sites on the Hawaiian islands of Kaua'i and Hawai'i (see Table S1 for locality data).  
 121 Field collections were performed under permits issued by the following: Hawai'i Department of Land and  
 122 Natural Resources, Hawai'i Island Forest Reserves, Kaua'i Island Forest Reserves, Koke'e State Park, and  
 123 Hawai'i Volcanoes National Park. Adult flies were maintained in the field on vials with sugar media and kept  
 124 at cool temperatures. They were transported alive back to Cambridge, MA where they were maintained on  
 125 standard *Drosophila* media at 18°C. Samples were processed for RNA extraction between 5 and 31 days after  
 126 collecting them live in the field (average 10.8 days, see Table S1). One species, *Scaptomyza varia*, was caught  
 127 in the field before the adult stage by sampling rotting *Clermontia sp.* flowers (the oviposition substrate).  
 128 For this species, male and female adult flies emerged in the lab, and were kept together until sampled for  
 129 RNA extraction.

## 130 3.2 Species identification

131 Species were identified using dichotomous keys<sup>45–49</sup>, when possible. Many keys for Hawaiian Drosophili-  
132 dae are written focusing on male specific characters (e.g. sexually dimorphic features or male genitalia)<sup>47</sup>.  
133 Therefore, for species where females could not be unambiguously identified by morphology, we verified their  
134 identity using DNA barcoding. When males were caught from the same location, we identified males to  
135 species using dichotomous keys and matched their barcode sequences to females included in our study. We  
136 also matched barcodes from collected females to sequences previously uploaded to NCBI<sup>50–52</sup>.

137 The following dichotomous keys were used to identify species: for *picture-wing* males and females, Magnacca  
138 and Price (2012)<sup>45</sup>; for *antopocerus* males, Hardy (1977)<sup>46</sup>; for *Scaptomyza*, Hackman (1959)<sup>47</sup>; for species  
139 in the *mimica* subgroup of MM, O’Grady and colleagues (2003)<sup>48</sup>; for other miscellaneous species, Hardy  
140 (1965)<sup>49</sup>.

141 For DNA barcoding, DNA was extracted from one or two legs from male specimens using the Qiagen DNeasy  
142 blood and tissue extraction kit, or from the DNA of females isolated during RNA extraction (see below). We  
143 amplified and sequenced the cytochrome oxidase I (COI), II (COII) and 16S rRNA genes using the primers  
144 and protocols described in Sarikaya and colleagues (2019)<sup>40</sup>.

145 For barcode matching, we aligned sequences using MAFFT, version v7.475<sup>53</sup>, and assembled gene trees  
146 using RAxML, version 8.2.9<sup>54</sup>. Definitive matches were considered when sequences for females formed a  
147 monophyletic clade with reference males or reference sequences from NCBI; see Table S2.

148 Female *D. primaeva*, *D. macrothrix*, *D. sproati*, and *D. picticornis* could be identified unambiguously using  
149 dichotomous keys. Female *D. atroscutellata*, *D. nanella*, *D. mimica*, *D. tanythrix*, *S. cyrtandrae*, *S. varipicta*,  
150 and *S. varia* were identified by matching barcodes to reference sequences from NCBI, reference males, or  
151 both. For the female *haleakalae* fly used in this study, no male flies were caught in the same location as these  
152 individuals, and no other sequences for *haleakalae* males on NCBI were an exact match with this species.  
153 Given its similar appearance to *Drosophila dives*, we are referring to it here as *Drosophila* cf *dives*, and we  
154 await further molecular and taxonomic studies of this group that will resolve its identity.

## 155 3.3 Sampling strategy

156 The target number of mature, healthy female flies per species was four, with three intended for dissection  
157 and species specific expression libraries and one intended as a whole-body reference library (Fig. 1). When  
158 four such individuals were not available, a reference library was assembled by combining the tissue-specific  
159 libraries from one of the other individuals. This was the case for the following species: *D. sproati*, which  
160 was dissected and had RNA extracted separately from the head, ovaries, and carcass, with RNA combined  
161 prior to library preparation; and *S. varia*, *S. cyrtandrae* and *D. cf dives*, for which RNA was extracted and  
162 libraries prepared for separate tissues, and raw reads were combined after sequencing.

163 For the other eight species, sufficient individual females were available such that reads for transcriptome  
164 assembly were sequenced from a separate individual. In these cases one entire female fly was dissected and  
165 photographed to assess whether vitellogenic eggs were present in the ovary, and all tissues were combined in  
166 the same tube and used for RNA extraction. Library preparation failed for one individual *D. atroscutellata*  
167 fly, as well as two tissue-specific libraries: one head sample from *D. mimica*, and one head sample from *D.*  
168 *sproati*.

## 169 3.4 Dissection and RNA sequencing

170 Female flies were anesthetized in 100% ethanol and were dissected in a phosphate-buffered saline solution.  
171 The ovary was separated from the abdomen, and the head was separated from the carcass. Photographs  
172 of each tissue were taken, and tissues were moved to pre-frozen eppendorf tubes, kept in dry ice, and  
173 immediately transported to a -80°C freezer. Dissections were performed as quickly as possible to prevent

174 RNA degradation. Samples were stored at -80°C for between 90 and 336 days before RNA extraction (average  
175 281.9 days, see Table S1).

176 RNA was extracted from frozen samples using the standard TRIzol protocol ([http://tools.thermofisher.com/content/sfs/manuals/trizol\\_reagent.pdf](http://tools.thermofisher.com/content/sfs/manuals/trizol_reagent.pdf)). One mL of TRIzol was added to each frozen sample, which  
177 were then homogenized using a sterile motorized mortar. The recommended protocol was followed without  
178 modifications, using 10 µg of glycogen, and resuspending in 20µL RNase-free water-EDTA-SDS solution.  
179 DNA for subsequent barcoding was also extracted using the phenol-chloroform phase saved from the RNA  
180 extraction.  
181

182 RNA concentration was checked using a Qubit fluorometer, and integrity was assessed with a Agilent TapeS-  
183 tation 4200. RNA libraries were prepared following the PrepX polyA mRNA Isolation kit and the PrepX  
184 RNA-Seq for Illumina Library kit, using the 48 sample protocol on an Apollo 324 liquid handling robot in  
185 the Harvard University Bauer Core Facilities. Final library concentration and integrity were again assessed  
186 using the Qubit and TapeStation protocols.

187 Samples intended for transcriptome assembly were sequenced on an Illumina HiSeq 2500, using the standard  
188 version 4 protocol, at 125 base pairs of paired-end reads. Samples intended for tissue-specific expression  
189 analyses were sequenced on an Illumina NextSeq 500, using a high output flow cell, at 75 base pairs of  
190 single-end reads. A table of total read counts for each library can be found in Tables S3-S4. To account  
191 for any possible batch effects across separate rounds of sequencing, each sequencing run was performed with  
192 one or several overlapping samples. Principle component analysis of these libraries showed variation between  
193 sequencing runs to be negligible relative to variation between tissue and individual (see Results and Fig.  
194 S7).

### 195 **3.5 Transcriptome assembling and expression mapping**

196 Transcriptome assembly and expression mapping was performed using the agalma pipeline, version 2.0.0<sup>55</sup>.  
197 For the twelve reference transcriptomes, reads from separate rounds of sequencing were concatenated and  
198 inserted into the agalma catalog. Further details of transcriptome assembly and homology assessment are  
199 included in our previous manuscript<sup>44</sup>.

200 Each tissue-specific expression library was mapped to the corresponding reference transcriptome using the  
201 ‘expression’ pipeline in agalma, which uses the software RSEM to estimate gene and isoform count levels  
202 from RNAseq data<sup>56</sup>. The agalma pipeline also includes steps to catalog the species, tissue type, and run  
203 information, which were exported as a single JavaScript object notation (JSON) file. This file is available in  
204 the GitHub repository in the directory `analysis/data`.

### 205 **3.6 Phylogenetic analysis**

206 The phylogenetic methods for inferring homology, orthology, and estimating gene and species trees are the  
207 same as those described in our previous manuscript<sup>44</sup>. Genetrees were additionally annotated with the  
208 software Phyldog<sup>57</sup>.

### 209 **3.7 Annotating transcripts by sequence similarity**

210 We leveraged the close relationship of these species to species of *Drosophila* with well-annotated genomes to  
211 annotate the transcripts considered here. For each transcript in the reference transcriptome, we performed  
212 four comparisons of sequence similarity using local BLAST: [1] comparing nucleotide transcript sequences to  
213 nucleotide sequences from *D. melanogaster* (blastn), [2] comparing translated nucleotide sequences to protein  
214 sequences of *D. melanoagster* (blastx), [3] comparing nucleotide sequences to a database of nucleotide se-  
215 quences from *D. melanogaster*, *D. virilis*, and *D. grimshawi* (blastx), and [4] comparing translated nucleotide  
216 sequences to a database of protein sequences from the same three species (blastn). For downstream analyses,



217 we prioritized annotations from the second comparison, but we provide all sequence similarity reports in the  
218 GitHub repository under the directory `analysis/BLAST`.

219 To annotate homolog groups as defined by the homology inference step of agalma, we extracted the name  
220 and sequence ID from all *D. melanogaster* sequences in the group.

### 221 **3.8 Normalization and differential gene expression**

222 Transcript count tables were imported into R using the agalmar package, version 0.0.0.9000. Differential gene  
223 expression analysis was performed using the package DESeq2, version 1.32.0. For these analyses we used only  
224 one sequencing run per library, thereby excluding duplicate sequencing runs. Analyses of differential gene  
225 expression were calculated using the default approaches in DESeq2 for estimating size factors, dispersions,  
226 and calculating  $\log_2$  fold-change and p-values (Fig. S2A). Both individual and tissue were considered in the  
227 design formula. Transcripts were considered differentially expressed at a significance threshold of 0.01.

228 We identified a cohort of core ovary-specific genes by first identifying a parent gene for each transcript using  
229 a sequence similarity search against *D. melanogaster* (Fig. S2A). We then identified parent genes that had  
230 at least one transcript significantly differentially upregulated in the ovary of more than ten of the twelve  
231 species. Because multiple transcripts may match to a single parent-gene, core ovary-specific parent genes  
232 may include transcripts that are also not differentially upregulated in the ovary, as long as at least one  
233 transcript is for more than ten out of twelve species. This may be the case when transcripts are artificially  
234 fragmented during reference transcriptome assembly, or when sequence-similar transcripts have biologically  
235 distinct expression levels.

### 236 **3.9 Comparison of expression to *D. melanogaster***

237 We compared our differential gene expression results to a reference database of tissue expression from *D.*  
238 *melanogaster*, known as the FlyAtlas2<sup>29</sup>. We downloaded this reference in July of 2021, from [http://motif.gla.ac.uk/downloads/FlyAtlas2\\_21.04.18.sql](http://motif.gla.ac.uk/downloads/FlyAtlas2_21.04.18.sql). This dataset provides data on transcript abundance and tissue  
239 enrichment, including for female ovaries. Tissue enrichment is calculated using the same methods as in the  
240 FlyAtlas2 web browser, defined as the fragments per kilobase of transcript per million mapped reads (FPKM)  
241 for a given tissue divided by that value for the reference tissue (here, female whole body), with a pseudocount  
242 of two counts added to empty values to avoid division by zero. We considered a FlyAtlas gene to be enriched  
243 in the ovary, comparable to our data, if the ovary was the maximum enrichment value across all tissues  
244 excluding the head, brain, and eye tissues, as these were separated in our RNASeq procedure (Fig. S2A).  
245 We considered a FlyAtlas gene to be head enriched if either the head, brain, or eye were the maximum  
246 enrichment value, excluding the ovary.  
247

### 248 **3.10 Transforming data into comparable measurements of expression across 249 species**

250 Transcript counts are reported in transcripts per million (TPM), but this measurement is known to not  
251 be directly comparable across species due to differences in reference transcriptome size<sup>7,8</sup>. Therefore, we  
252 normalized TPM by species using the procedure described by Munro and colleagues (2021)<sup>8</sup>, where TPM  
253 values are multiplied by the number of genes in the reference, and this value is divided by  $10^4$  (Fig. S2B).  
254 TPM10k values were natural-log transformed.

255 An additional challenge when working with reference transcriptomes is the presence of fragmented transcripts  
256 created during the assembly process<sup>58</sup>. This fragmentation can result in noise in estimating the amount of  
257 transcript as reads are differentially mapped to these fragments. To reduce the impact of this noise on our  
258 analysis, we undertook a novel approach where transcripts were grouped according to inferred homology  
259 as estimated by the agalma pipeline using an all-by-all BLAST approach (Fig. S2B). For each sequenced  
260 library, we then found the average count value across all transcripts from the same homology group (see

261 Table S5 for statistics on homology group composition). For each species-tissue pair, we then averaged this  
262 value across all biological replicates, here replicate individuals.

### 263 3.11 Linear modeling

264 We performed linear modeling to calculate the relative contribution of tissue- and species-level differences  
265 to variation in gene expression (Fig. S2B), following the approach of Breschi and colleagues (2016)<sup>21</sup>. These  
266 analyses were performed separately on datasets of ovary vs. carcass and head vs. carcass expression. Using  
267 the ANOVA script provided at <https://github.com/abreschi/Rscripts/blob/master/anova.R>, we built  
268 a linear model for each gene that accounts for the contribution of the organ, species, and any residual error.  
269 We then calculated the relative proportion of each factor divided by the total sum of squares for all factors.  
270 We identified groups of highly variable genes, using the same metrics defined by Breschi and colleagues  
271 (2016)<sup>21</sup>, as any gene for which either tissues or species explains at least 75% of the variance. Species  
272 variable genes (SVGs) were defined as highly variable genes whose relative variation was two-fold greater  
273 across species than tissues (vice-versa for tissue variable genes, TVGs).

274 We performed these linear model analyses over four nested clades: a clade containing two *picture-wing* species  
275 (*D. sproati* and *D. macrothrix*); a clade containing the four *picture-wing-Nudidrosophila-Ateledrosophila*  
276 species in this study; a clade containing the nine Hawaiian *Drosophila* species in this study; and a clade of  
277 all 12 Hawaiian *Drosophila* and *Scaptomyza* species in this study. We repeated these analyses excluding the  
278 species *S. varia*, which showed the lowest similarity in expression to the other eleven species. To compare  
279 our analysis to the more typical approach undertaken, we also performed these analyses on all pairwise  
280 combinations of these twelve species.

### 281 3.12 Reconstructing evolutionary history of differential expression

282 We calculated tissue bias as the ratio of counts in TPM10k for each tissue (ovary and head) to the reference  
283 tissue<sup>7</sup>, here the carcass (Fig. S3A). We subsequently performed the same transformation steps described  
284 above, averaging over ratios from the same homology group and across biological replicates, to calculate  
285 average expression bias per homology group per library. To avoid division by zero, we added a pseudocount  
286 of 0.01 to each TPM10k value. Ratio values were natural-log transformed so that positive values indicate  
287 enrichment in the tissue of interest relative to the reference tissue, negative values indicate the opposite, and  
288 values of zero indicate equivalent expression.

289 We reconstructed the evolutionary history of tissue bias for each homology group using the species tree  
290 published in Church and Extavour, 2021<sup>44</sup>, based on the same reference transcriptome data (Fig. S2C).  
291 First, we calibrated the tree estimated using IQtree (Fig 1A of that publication) to be ultrametric using the  
292 R function `chronos` in the package `ape`, version 5.5 (using a correlated model and a lambda value of 1). We  
293 then subset this tree to only include tips for which expression data was available, and annotated this tree to  
294 be able to identify specific branches and nodes in ancestral state reconstruction analyses.

295 Ancestral expression bias values were estimated with the R package Rphylopars, version 0.3.2, using the fast  
296 ancestral state reconstruction algorithm based on Ho and Ané, 2014<sup>59</sup> (Fig. S3A). Tips for which expression  
297 data were not available were dropped from each reconstruction, and ancestral state reconstruction was only  
298 performed when more than 3 tips had data. Following ancestral state reconstruction, we calculated the  
299 scaled change as the difference between the value at the ancestral and descendant nodes, divided by the  
300 length of the branch. Scaled changes were compared between homology groups by identifying equivalent  
301 branches as those that share the same parent and child node, following the procedure described in Munro  
302 and colleagues (2021)<sup>8</sup>. We identified qualitative changes in expression bias as changes that resulted in a  
303 ratio changing from negative to positive values or vice versa.



### 304 **3.13 Estimating correlated evolution of expression across genes**

305 For each homology group that had representation across all twelve species, we calculated pairwise Pear-  
306 son’s correlation coefficients by comparing scaled changes in expression bias across equivalent branches (Fig.  
307 S3B). For the twelve-species phylogeny, this meant each correlation coefficient was calculated using 22 in-  
308 dividual data points (branches). This resulted in a correlation matrix of 1,306,449 pairwise comparisons of  
309 evolutionary correlation.

310 We compared this correlation network to data on protein interactions and genetic interactions downloaded  
311 from <http://flybase.org> in July, 2021. These data include pairwise observations of genetic enhancement  
312 and suppression interactions between parent genes in *D. melanogaster*. These interactions were matched to  
313 pairwise correlation coefficients by identifying the corresponding homology group for each *D. melanogaster*  
314 parent gene ID (more than one parent gene may fall into the same homology group).

315 We tested whether correlation coefficients for known genetic interaction partners were higher than in genes  
316 with unknown interactions using two-sample t-tests. In each test we compared the coefficients for either  
317 enhancement or suppression interactions to a random sample of 5000 coefficients for which interactions are  
318 unknown. We repeated these t-tests 100 times using different random samples, and report the maximum  
319 p-value observed. We also compared the distribution of enhancement and suppression interaction coefficients  
320 to each other using a single t-test.

321 Strong correlations for the visualization of co-evolutionary networks were selected using a threshold correla-  
322 tion coefficient of 0.825.

## 323 **4 Data Availability**

324 All data, results, and code for this manuscript are available at GitHub, under the repository  
325 [shchurch/hawaiian\\_drosophilidae\\_expression\\_2021](https://github.com/shchurch/hawaiian_drosophilidae_expression_2021), commit 67d8e6f. The code to perform all  
326 agalma commands was performed in clean anaconda environment, installed following the instructions  
327 at <https://bitbucket.org/caseywdunn/agalma>. All R commands were performed with a fresh install  
328 of R, and the session information including all package versions is available in the GitHub repository  
329 under the file `r_session_info.txt`. The code to generate all plots as well as the text of this manuscript  
330 is available in several R scripts and Rmarkdown files at the same location. The resulting correlation  
331 matrix can be interactively visualized and queried at the accompanying data visualization for this paper  
332 ([https://github.com/shchurch/hawaiian\\_fly\\_dataviz\\_2021](https://github.com/shchurch/hawaiian_fly_dataviz_2021)).

## 333 **5 Results**

### 334 **5.1 Differential gene expression reveals a cohort of consistently ovary-specific** 335 **genes**

336 We observed several patterns in tissue-specific gene expression that are consistent across all twelve species.  
337 First, in all species the main axis of variation separated ovary RNA libraries from head and carcass (Fig.  
338 S4). In all species this axis accounted for at least 50% of variation, and in several species greater than 70% of  
339 variation. To test for possible variation due to different runs on the sequencer, we resequenced several libraries  
340 and compared them using principle component analysis. We found variation between sequencing runs to be  
341 negligible compared to variation across tissues and individuals (Fig. S7). Second, in all species we observed  
342 that there was a larger amount of significantly downregulated transcripts than upregulated in the ovary  
343 relative to the carcass (Fig. 2A-B, S5). Across species, we observed an average of 27.7% to be significantly  
344 downregulated and 15.5% of transcripts to be significantly upregulated. In contrast, when comparing the  
345 head to the carcass, we observed an average of 10% of transcripts to be significantly upregulated and 10.5%  
346 to be significantly downregulated (Fig. S6). Therefore the ovary shows a larger number of both upregulated

347 and downregulated genes relative to the carcass than the head, indicating the ovary has a particularly distinct  
348 expression profile. These differences may also reflect variation in the complexity and diversity of functions  
349 of the tissues being compared.

350 We used the results of our differential gene expression analysis within species to test for the existence of a  
351 suite of genes that show consistent ovary-specific expression across species. We found a cohort of 131 genes,  
352 grouped according to BLAST sequence similarity to *D. melanogaster*, for which at least one transcript was  
353 significantly upregulated in the ovaries of more than ten species (Fig. 2C). Transcripts matching these genes  
354 made up on average 24.6% of the significantly ovary-upregulated transcripts across species, indicating that a  
355 substantial portion of ovary-specific genes have conserved expression patterns over evolutionary time (17.7%,  
356 excluding the species *S. varia* that had the most distinct expression profile of all species).

357 We then tested the extent to which these core ovary genes correspond to observations in well-studied labo-  
358 ratory *Drosophila* models. To accomplish this, we compared expression across Hawaiian species to reported  
359 tissue-specific expression levels from *D. melanogaster*<sup>29</sup>. We found that Hawaiian core ovary-specific genes  
360 show nearly universal enrichment in the ovary of *D. melanogaster* as well, as reported in the FlyAtlas2  
361 dataset<sup>29</sup> (Fig. 2D). We likewise observed that genes reported in *D. melanogaster* to have highest enrich-  
362 ment in the ovary largely correspond to genes that are significantly upregulated in the ovaries of Hawaiian  
363 species (Fig. S8).

364 The 131 core ovary genes include several well-known members involved in oogenesis and germline stem cell  
365 renewal such as *nanos*<sup>34</sup>, *swallow*<sup>35</sup>, and *oskar*<sup>60</sup> (Fig. 2E). We found only two genes that were identified as  
366 Hawaiian core ovary genes that are not reported in the FlyAtlas2 dataset<sup>29</sup> to be enriched in the ovary of *D.*  
367 *melanogaster*: the SET domain binding factor *sbf*, and *Rfx*, which are reported to be enriched in the heart,  
368 brain, and other non-reproductive tissues<sup>29</sup>.

369 We used the same approach to identify a core suite of 52 head-specific genes (Fig. S9). There was no  
370 overlap between the sets of core head genes and core ovary genes. To test whether the correspondence  
371 between expression observations in Hawaiian flies and *D. melanogaster* might be due to factors beyond  
372 tissue identity, we compared head expression values to ovary enrichment data from *D. melanogaster*, as we  
373 had done for ovary expression values above. We did not observe a correspondence in either direction between  
374 expression in the head of Hawaiian species and enrichment in the ovary of *D. melanogaster* (Fig. S10A).  
375 In contrast, we did find a correspondence between head-specific expression and genes enriched in the *D.*  
376 *melanogaster* brain, eye, and head (Fig. S10B). Core head genes include *Rhodopsin* photoreceptor genes and  
377 genes such as *hikaru genki* with involvement in synaptic centers<sup>61</sup>.

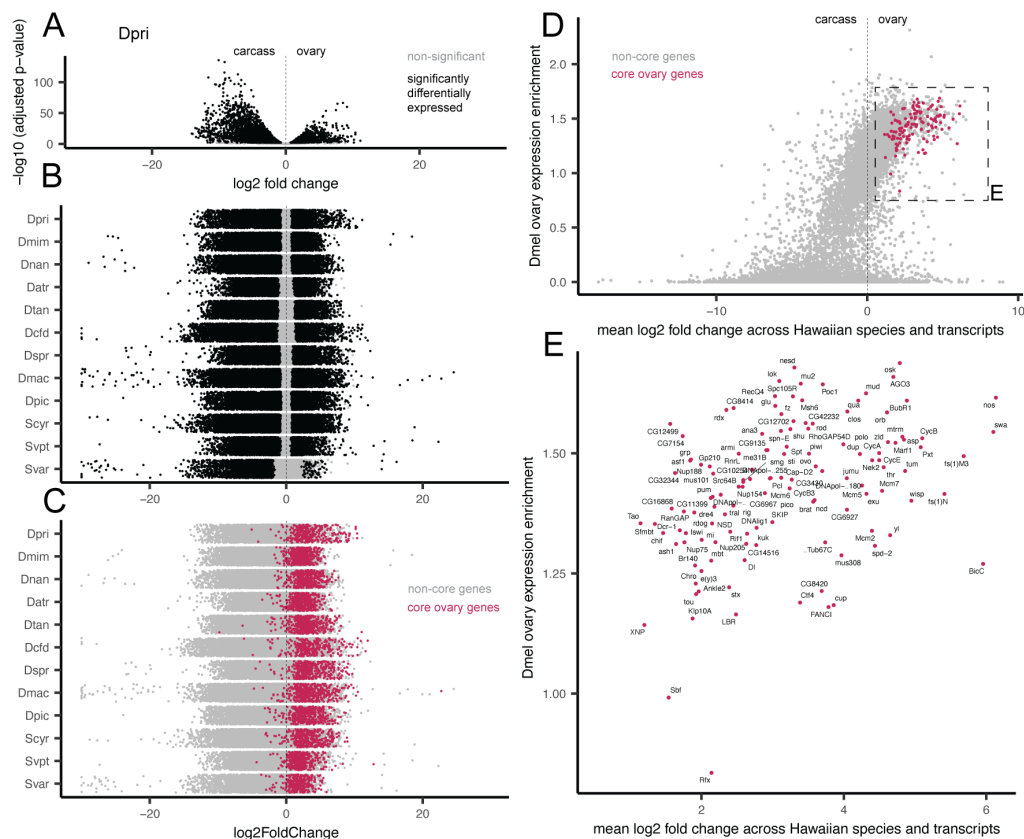

Figure 2: **Identifying a cohort of ovary-specific genes across drosophilid species.** A, Volcano plot for one example species, *D. primaeva* (Dpri), showing the results of a differential gene expression analysis comparing the ovary to the carcass. The x-axis shows the  $\log_2$  fold change of expression across transcripts, and the y-axis shows the adjusted p-value,  $\log_{10}$  transformed. Points that are significantly differentially expressed are shown in black. B, Jitter plots showing the results of the same analysis across the twelve species studied here. The x-axis shows the  $\log_2$  fold change of expression across transcripts, and points are arranged with random jitter within species on the y-axis. C, The same jitter plots, but now colored according to whether or not transcripts belong to a cohort of core ovary genes. These are defined as genes, grouped by BLAST similarity to *D. melanogaster* transcripts, for which at least one transcript is upregulated in the ovary of ten or more of the twelve species. D, A comparison of mean expression change across Hawaiian species to reported ovary-enrichment values from *D. melanogaster*, as reported in FlyAtlas2<sup>29</sup>. Core ovary genes are marked in magenta. E, The same plot, now showing only core ovary genes, annotated with the gene symbol from *D. melanogaster*.

## 378 5.2 Modeling reveals the phylogenetic decay of expression similarity between 379 tissues

380 Many studies have investigated the question of whether we expect expression to be more similar across the  
381 same organ in different species, or across different organs within the same species<sup>13–20</sup>. Recent studies have  
382 suggested that the answer to this question will depend on the phylogenetic distance separating the species  
383 being compared<sup>21</sup>. Here we used a modeling approach to investigate this question with respect to the ovaries  
384 of Hawaiian drosophilids.

385 First, we determined an appropriate unit of comparison across species, based on an assessment of homol-  
386 ogous features between reference transcriptomes. The agalma pipeline provides a method for determining

387 homologous and orthologous sequences using an all-by-all BLAST approach to determine clusters of recipro-  
388 cally similar sequences (homology groups). These can then be divided into orthology groups by estimating  
389 genetrees and identifying maximally inclusive subtrees with no more than one sequence per taxon<sup>55</sup>. We  
390 compared the representation of species across homology and orthology groups, and observed that while the  
391 representation of homology groups increases with the number of species compared, representation of or-  
392 thology groups decreases (Fig. S11). This is a known obstacle in comparative transcriptomics, attributed  
393 to many transcripts being artifactually fragmented during reference transcriptome assembly<sup>58</sup>. To reduce  
394 the impact of this on our downstream analyses, we averaged TPM values across all transcripts within a  
395 homology group for each sequenced RNA library. Principle component analysis of this average expression  
396 dataset showed that the first principle component divides ovary libraries from the rest, while the second com-  
397 ponent separates samples along an axis that largely corresponds to phylogenetic distance between species  
398 (Fig. S12). While this averaging approach reduces noise due to variable mapping affinities of fragments of  
399 the same transcript, it comes at the cost of averaging over potential variation between genuine transcripts  
400 that fall into the same homology group. Future analyses using improved assemblies for transcriptomes or  
401 genomes will likely be able to avoid this trade off and compare transcript counts directly.

402 With average expression counts for homologous transcripts across species, we tested the degree to which  
403 variation across this dataset could be attributed to tissue-specific variation (here, ovary vs. carcass), species  
404 specific variation, or neither (residual variation). Using the linear modeling approach adapted from Breschi  
405 and colleagues (2016)<sup>21</sup>, we found the proportion of variance across the dataset attributed to tissue differences  
406 decreased with phylogenetic distance, while the proportion attributed to species difference increased (Fig.  
407 3A-C). In addition, we found that, when comparing ovary and carcass tissues, the Hawaiian drosophilid clade  
408 encompasses the crossover point where variation across species swamps variation across tissues (crossed lines,  
409 Fig. 3A). When comparing across the two species from the *picture-wing* group included in this study, an  
410 average of 45.6% of the variation can be attributed to tissue differences. For the same comparison, 960 genes  
411 were identified as tissue variable genes, defined as residual variation accounting for <25% and a two-fold  
412 increase in variation attributed to tissues than to species (Fig. 3B, S13). In contrast, when comparing across  
413 all twelve Hawaiian drosophilid species studied here, 34.7% of the variation can be attributed to tissue, with  
414 240 TVGs (Fig. 3B, S13). Across different clades of comparisons, the number of species-variable genes  
415 (SVGs) remains relatively stable (from 304 to 260, Fig. 3B).

416 We then leveraged the results of this linear modeling approach across all twelve species to perform an  
417 additional screen for genes that are consistently upregulated in ovaries across species. We compared the  
418 proportion of variation explained by tissue for each homology group to the average log<sub>2</sub> fold change from the  
419 results of our differential gene expression analysis (Fig 3D). This comparison allowed us to identify genes  
420 that fall above our threshold for TVGs that are also upregulated in the ovary (Fig 3E). This group of genes  
421 includes many of the same members as the core ovary genes (e.g. *nanos* and *swallow*), as well as several new  
422 candidates (e.g. *singed*).

423 To test the importance of tissue identity, we repeated the same analysis comparing variation across species  
424 and tissues using the head in place of the ovary. Consistent with what we describe for the ovary and carcass,  
425 as phylogenetic distance increases the proportion of variation across tissues decreases while variation across  
426 species increases. In contrast to the above findings, however, for the head and carcass far less of the variation  
427 in gene expression can be attributed to tissue differences (Fig. S14). For these tissues, the crossover point  
428 between total proportion of variation occurs roughly at the distance separating the two *picture-wing* species.

429 To verify these results were not driven by the species *S. varia*, which had the most distinct expression patterns  
430 of all species, we repeated these analyses excluding this species and recovered largely equivalent results (Fig.  
431 S15). To compare our findings to those that would be recovered using a more typical pairwise approach,  
432 we repeated the linear modeling analysis on ovary and carcass data using every pairwise combination of  
433 the twelve species. We recovered the same trend of decreasing contribution of tissue-level variation with  
434 increasing phylogenetic distance, and observed that the variance in mean proportion attributed to either  
435 species- or tissue-level differences increased as well (Fig. S16).

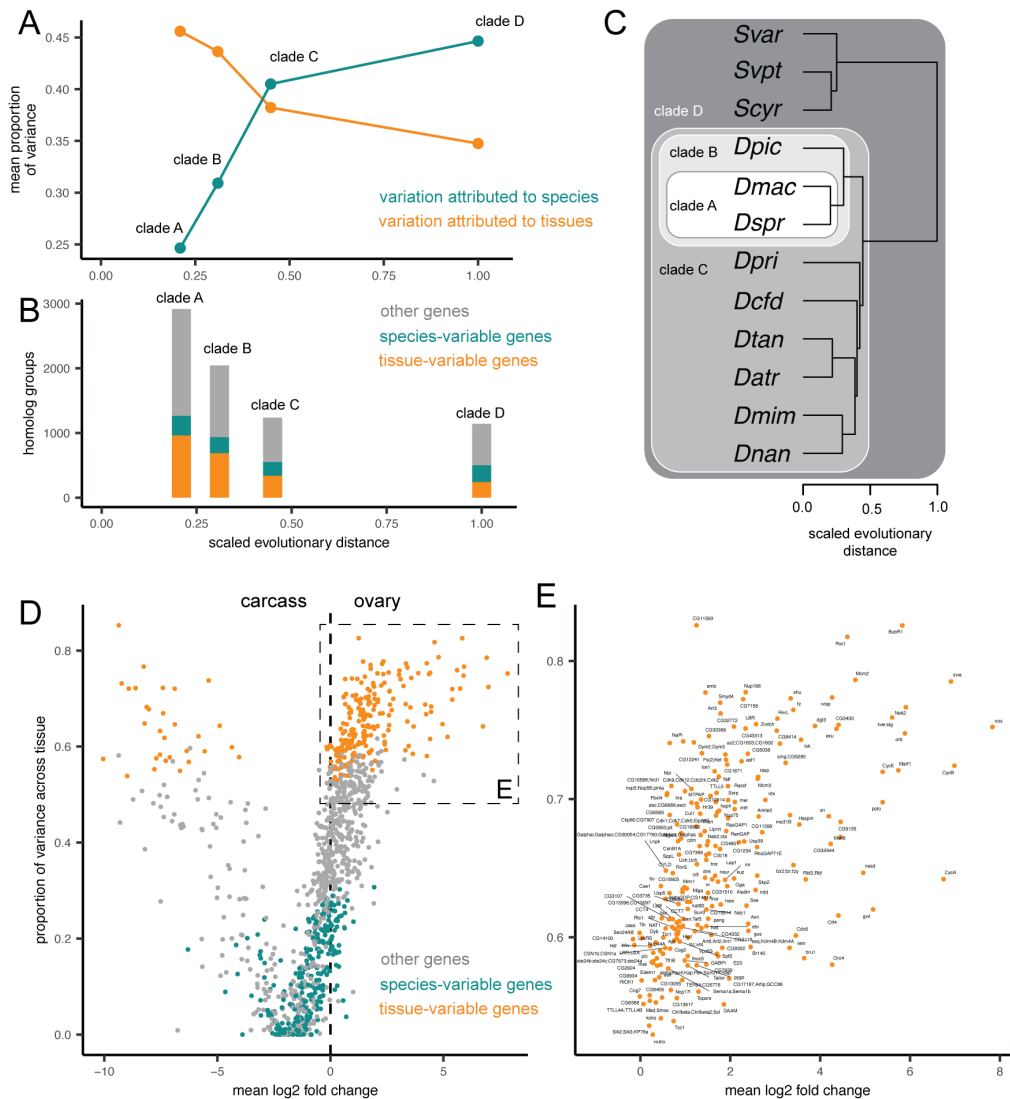

**Figure 3: Linear modeling shows the proportion of variance explained by differences across tissues and species.** A, The results of a linear modeling approach to calculate expression variation for each gene, attributed to variation across organs, species, or residual variation, as described in Breschi and colleagues (2016)<sup>21</sup>. The average proportion of variation attributed to tissues is higher than that attributed to species for the two *picture-wing* species in clade A, while the opposite is true for all twelve species in clade D. B, The number of genes, defined by homology group, classified as tissue variable genes (TVGs), species variable genes (SVGs), or neither in each clade comparison. C, The phylogeny of the twelve species studied here, showing the four clades compared in A-B. Scaled evolutionary distance is calculated as the relative distance from the most recent common ancestor of Hawaiian drosophilids to extant species. D, Comparing results of the differential gene expression approach (log<sub>2</sub> fold change) on the x-axis to results of the modeling approach on the y-axis (variation across tissues). Genes are colored according to TVGs and SVGs. The inset box highlights TVGs that are upregulated in the ovary relative to the carcass. E, The same plot, now showing only upregulated TVGs, annotated with the gene symbol from the *D. melanogaster* sequences in the same homology group.

### 436 5.3 Identifying gains and losses of ovary bias across genes and the phylogeny

437 While a substantial fraction of ovary-specific transcripts belong to the cohort of core ovary genes, on average  
438 75.4% of transcripts are upregulated in the ovaries of one or several species, but not consistently across ten or  
439 more of the species studied here (Fig 2B-C). This is suggestive of many evolutionary gains and losses of ovary  
440 biased expression of genes. We characterized the evolution of these gains and losses using an ancestral state  
441 reconstruction approach. First we quantified expression bias between tissues as the ratio of read counts<sup>7</sup>,  
442 then reconstructed the value of this continuous trait for each gene (defined using homology groups) at each  
443 node of the estimated species tree (Fig. S3). We then calculated the scaled change of expression bias along  
444 each branch, which allowed us to describe how relative expression values between tissues had changed the  
445 course of evolutionary time (Fig 4A). Visualizing the distribution of scaled changes by genes shows that  
446 most scaled changes are small and centered around zero, representing little change in gene expression bias  
447 between tissues (Fig. 4B-C).

448 Using this dataset of scaled changes across genes and branches, we identified branches for which the direction  
449 of tissue bias had changed (e.g. from higher expression in the ovary biased than the carcass to lower, or vice  
450 versa). Visualizing this dataset according to branches reveals that the majority of these changes in bias are  
451 located on the root and terminal branches, rather than internal branches (Fig 4D-E). This is likely because  
452 internal branches for this rapid radiation tend to be very short; even when scaling evolutionary changes to  
453 branch length, it is less probable to experience a shift to and from ovary biased on a short branch than a  
454 long branch. Visualizing the distribution of genes by ancestral and descendant values allows us to identify  
455 shifts in bias which represent the largest swings in expression values (Fig. 4F, points a-d). Highlighting the  
456 top two such shifts in both directions, we identify four example genes which acquired or lost ovary-specific  
457 expression in the phylogeny of Hawaiian Drosophilidae. In the case of *FMRFaR* and *GABA*, a few Hawaiian  
458 species have gained ovary biased expression of these genes, while most species and the ancestral state indicate  
459 non-ovary bias (Fig. 4Fa-b). In the case of *vilya* and the unnamed gene *CG9109*, each shows a pattern where  
460 one species has lost ovary bias from a biased ancestral state (Fig. 4Fc-d).

461 Repeating the same analysis using the head in place of the ovary revealed a set of evolutionary gains and  
462 losses in head-specific expression (Fig. S17). Identifying the top four changes in head expression shows gains  
463 and losses of head expression in the genes *hiro*, *stil*, *Jhe*, and, consistent with the ovary, *vilya*. In the case of  
464 the latter, these results may be driven by substantial changes in expression of *vilya* in carcass tissues across  
465 species, resulting in major differences in both ovary and head-biased expression.



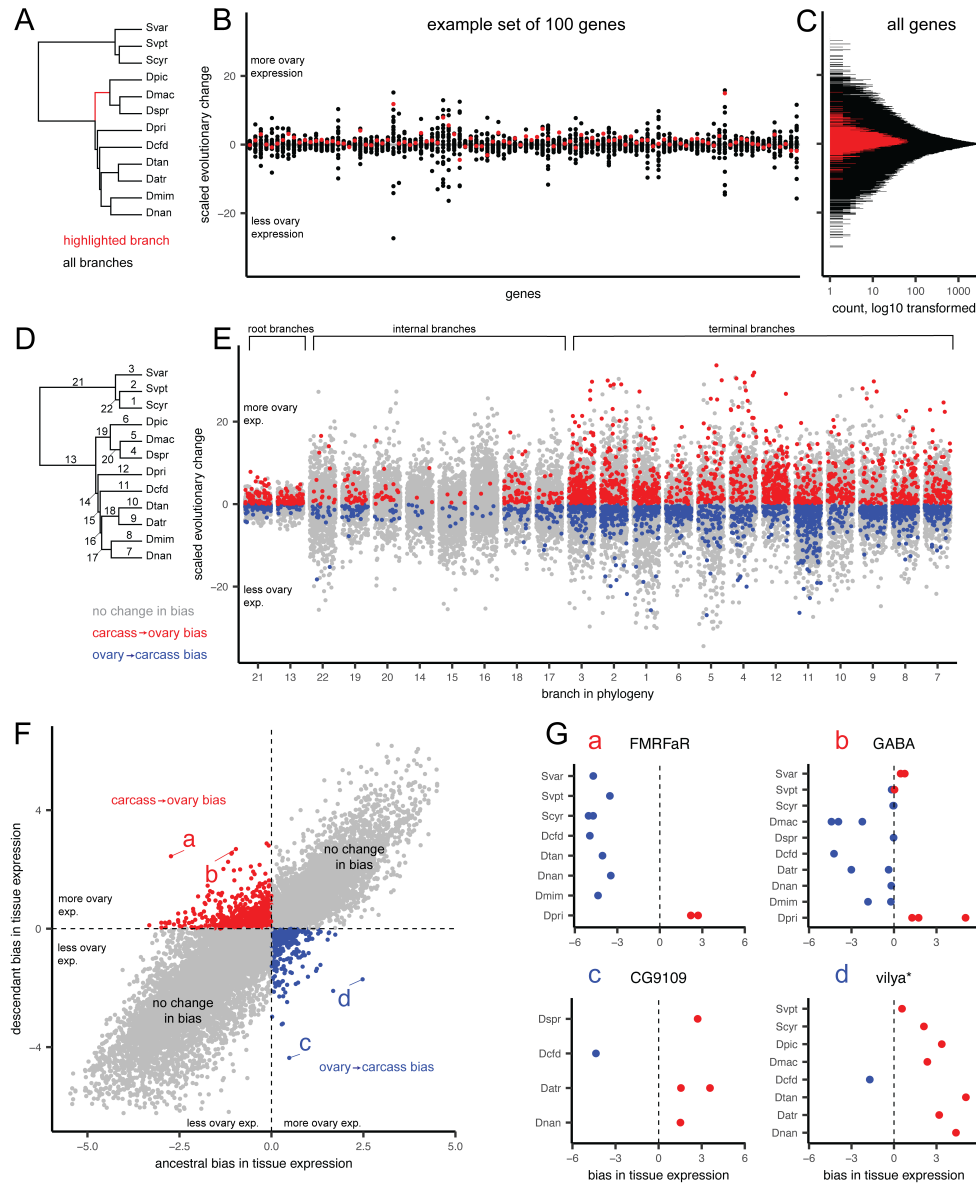

**Figure 4: Identifying genes that have gained and lost ovary expression across the phylogeny.** A, The phylogeny of the twelve species studied here, highlighting one example branch of the 22 for which we inferred the scaled evolutionary change in expression bias. B, The distribution of changes, grouped by gene, for 100 randomly selected genes, defined by homology group. Each point represents one of the 22 branches from A, with the red point corresponding to the highlighted branch from that panel. C, The distribution, log<sub>10</sub> transformed, of scaled genes across all branches and all genes. Changes on the highlighted branch in red. D, The phylogeny with all 22 branches numbered. E, The distribution of changes, grouped by branch, with random jitter on the x-axis within each group. Points colored according to the qualitative change in bias, either from more expression in ovary than carcass to less (blue), the reverse (red), or no change in overall bias (gray). F, The distribution of ancestral and descendant values, showing the two quadrants that represent qualitative changes in bias. Points that represent large swings in expression within those quadrants are labeled a-d. G, The four genes with large swings from F, showing the expression bias for each transcript colored according to more expression in the ovary (red) or carcass (blue). Panels annotated with the gene symbol from the *D. melanogaster* sequences in the same homology group, with the exception of *vilya*\*, which was annotated using a direct BLAST search since no *D. melanogaster* sequence was present in that group.

## 466 5.4 Genes with a strong correlation of expression evolution

467 We tested the estimated evolutionary changes in expression bias for evidence of correlated expression evolution between genes. For every gene represented across all species, we performed a pairwise comparison of  
468 changes in expression bias, using as data points the scaled change in ovary bias on the 22 branches in the  
469 phylogenetic tree. This resulted in 1,306,449 pairwise measures of evolutionary correlation between genes.  
470 Because the number of gene pairs being compared is much larger than the number of values used to estimate correlation, this method has the potential to produce many spurious correlations<sup>7</sup>. To test the degree  
471 to which the correlations observed here reflect known biological interactions between genes, we compared  
472 these measures to reported protein and genetic interactions between genes, using the database of published  
473 genetic experiments in *D. melanogaster*, available at <http://flybase.org>. We found that the mean correlation  
474 coefficient for genes that are known to physically interact as proteins was higher than for genes with no or  
475 unknown interaction (p-value=<0.001, Fig. 5A). This indicates that even with a relatively small number  
476 of observations, there is sufficient information in the matrix to detect biological signal between gene pairs.  
477 These results were calculated based on the correlation in expression bias between the ovary and carcass.  
478 However, following the same procedure using correlations in changes in head-biased expression showed no  
479 significant difference between the two groups (p-value=0.256, Fig. S18), suggesting the strength of this signal  
480 may be dependent on the tissues being compared.  
481  
482

483 We also found that genes known to interact via genetic enhancement or suppression have a significantly  
484 higher mean correlation than genes with no or unknown genetic interactions (unknown vs. enhancement  
485 p-value <0.001, unknown vs. suppression=<0.001, Fig. 5B). Comparing genes with known enhancement and  
486 suppression interactions to each other showed no significant difference (p-value=0.497). However, for genetic  
487 interactions, the range of correlation coefficients was higher in the group of no or unknown interactions (Fig.  
488 5B). This indicates that, while the average correlation of expression evolution might be higher for interaction  
489 partners, stronger positive and negative correlations exist between pairs of genes which do not interact, or  
490 for which interactions have not yet been tested.

491 As evidence of this, we compared the interaction network for known ovary-specific genes, to test whether the  
492 network inferred based on strong correlation of expression evolution was consistent with known interaction  
493 partners from *D. melanogaster*. We selected as an example the gene yolk-protein gene family, which are  
494 known to be expressed in the reproductive system, among other tissues<sup>62</sup> (Fig. 5C). We found 8 distinct  
495 homologous gene groups, comprising 14 unique *D. melanogaster* parent genes, that had a strong evolutionary  
496 correlation with yolk-protein genes (absolute coefficient greater than 0.825, Fig. 5D). None of these correlated  
497 genes correspond to those listed on FlyBase<sup>63</sup> as having known interactions with yolk-protein genes in *D.*  
498 *melanogaster* (Fig. 5E). We consider the strong evolutionary correlations to be a set of new predictions about  
499 evolutionary and genetic relationships between genes which can be tested in wild and laboratory model  
500 species of *Drosophila*. The dataset of pairwise correlation coefficients can be visualized and interrogated  
501 at the accompanying data visualization for this manuscript ([https://github.com/shchurch/hawaiian\\_fly\\_](https://github.com/shchurch/hawaiian_fly_dataviz_2021)  
502 [dataviz\\_2021](https://github.com/shchurch/hawaiian_fly_dataviz_2021)).

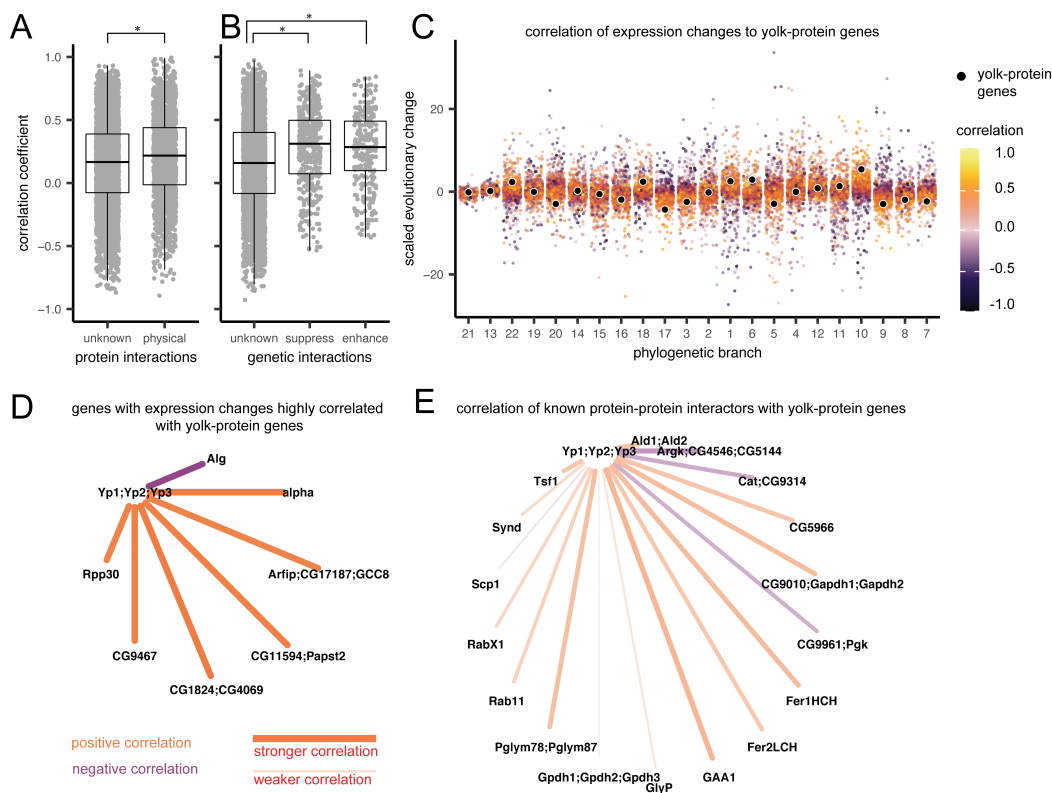

**Figure 5: Estimating pairwise correlation coefficients across genes reveals new networks of correlated expression evolution.** A-B Comparison of the distribution of Pearson's correlation coefficients based on ovary-biased expression evolution between genes. Asterisks indicate a significant t-test comparison. A, Genes with no or unknown protein-protein interactions compared to those with reported interactions in FlyBase<sup>63</sup> (p-value= $<0.001$ ). B, Correlation comparison between genes with no or unknown genetic interactions and those reported to have enhancement or suppression interactions in FlyBase (unknown vs. enhancement p-value= $<0.001$ ; unknown vs. suppression= $<0.001$ ; enhancement vs. suppression= $=0.497$ ). C, Each point represents a scaled change in expression bias, colored by Pearson's correlation coefficients relative to one example gene-family, the yolk-protein genes (black points), arranged by phylogenetic branch (numbers shown in Fig. 4D). Yellow=strong positive correlation, purple=strong negative correlation. D, The network of strong correlation partners (absolute correlation  $> 0.825$ ) with the yolk-protein genes, colored by the direction of correlation. Stronger correlations are shown by brighter colors, and thicker, shorter lines. Nodes are annotated with the gene symbols from the *D. melanogaster* sequences from that homology group. E, The correlation between known protein-protein interaction partners<sup>63</sup> with the yolk-protein genes.

## 503 6 Discussion

504 The results of this study show the importance of placing any comparison of gene expression across species  
 505 in an evolutionary context. When making comparisons that involve model organism for the study of  
 506 development and disease, this means identifying the crossover point at which variation between species  
 507 begins to swamp variation across the tissues or treatments in question. In such comparisons, the possibility  
 508 that any individual gene may show a divergent pattern of expression from the model organism increases  
 509 substantially. This study provides evidence that confirms we should expect variation in gene expression to  
 510 increase with the phylogenetic distance separating the species being compared. In addition, our results using  
 511 ovary and head expression data show that our expectation should also depend on the identity of the tissues

512 being compared. Our dataset demonstrates that for some tissues, like the fly head, this crossover point may  
513 be met even when comparing between two relatively closely related species.

514 Despite substantial variation across species, we describe here the composition of core suites of ovary- and  
515 head-expressed genes that have maintained conservation of expression patterns over millions of years of  
516 evolution. The core ovary genes include some of the most well-studied genes in relation to oogenesis, such  
517 as *nanos* and *oskar*, as well as many genes that have yet to be studied in depth (e.g. unnamed genes such  
518 as *CG3430*). We provide the full list of core ovary and head genes as a reference against which future  
519 genetic studies may be informed and compared (Tables S6-S7). Furthermore, the existence of these suites of  
520 genes suggests that equivalent groups are likely to exist within the many gene expression atlases currently  
521 being published<sup>64,65</sup>. New technologies such as single-cell RNA sequencing that use global signatures of gene  
522 expression to identify cells are ripe for interspecific comparisons that may reveal evolutionary conserved  
523 gene modules<sup>66</sup>. Developing robust comparative methods for comparing these atlases across species has  
524 the potential to reveal ancestral expression patterns in cells and organs, as well as pinpoint important  
525 evolutionary shifts in expression regulation.

526 Our results indicate that genes known to interact, both physically as proteins and through genetic enhance-  
527 ment and suppression, likely experience more correlated changes in expression than would be expected for  
528 genes chosen at random. However, we also find the difference in mean correlation between these groups to  
529 be relatively small, and dependent on the context of the tissue in question. One possible explanation for  
530 this finding is that interactions between genes with strong correlations of expression evolution have yet to be  
531 described. We provide an interactive tool to explore highly correlated genes that can inform future genetic  
532 studies in *D. melanogaster* and other related species ([https://github.com/shchurch/hawaiian\\_fly\\_dataviz\\_](https://github.com/shchurch/hawaiian_fly_dataviz_2021)  
533 2021). Another possibility we consider likely is that interactions between genes represent one factor among  
534 many that dictate the probability of correlated changes in expression. We hypothesize that other features,  
535 such as shared regulatory architecture, will also influence evolutionary correlation of expression.

536 As more studies undertake phylogenetic comparisons of functional genomic data, new factors that influence  
537 the evolutionary associations between genes are likely to be revealed<sup>7</sup>. The strength of these phylogenetic  
538 comparisons will depend in part on comparing across a sufficient number of taxa such that there are multiple  
539 branches on which to calculate and compare evolutionary changes. However, even as functional genomic  
540 data become more accessible for more species, the number of features being compared (e.g. thousands  
541 of genes) will likely continue to outnumber the number of evolutionary observations (e.g. changes along  
542 branches)<sup>7</sup>. One encouraging result from this study is that, using our matrix of gene expression changes  
543 along 22 branches, there is sufficient information to detect the biological signal associated with physical and  
544 genetic interactions. While this is true, we assume that some fraction of the correlations that we report here  
545 represent false positives, and that the strength of correlation of these genes would decrease with the addition  
546 of more taxa to the comparison. For this reason we present the correlation matrix as a set of hypotheses to  
547 be tested in future studies using additional lines of evidence.

548 One outstanding challenge in expression evolution is the quality of the references available against which  
549 RNA reads can be mapped<sup>58</sup>. In this study we account for the statistical noise in our data by averaging  
550 expression values over groups of homologous genes, as identified by sequence similarity to high quality refer-  
551 ence genomes. This approach has the advantage of accounting for problems associated with fragmentation of  
552 genes in transcriptome assembly. However, it comes at the cost of averaging over possible biological variation  
553 in expression between genes from the same gene family. The strong concordance of our results with published  
554 records from *D. melanogaster* suggests that the approach we have used here is robust for our dataset. How-  
555 ever, as the quality and accessibility of genomes from diverse species continue to increase, future studies will  
556 likely be able to compare directly between orthologous genes without needing to account for fragmentation.  
557 For those future studies, a phylogenetic comparative approach like the one used here and elsewhere<sup>8</sup> can  
558 serve as an analytical framework to move expression comparisons beyond pairwise comparisons.

559 A goal of evolutionary-developmental biology is to identify changes in developmental mechanisms that un-  
560 derlie phenotypic differences<sup>12</sup>. Many evo-devo studies approach this by identifying phenotypic variation  
561 between species and then searching for differences in gene content or expression using one or several emerg-  
562 ing model organisms in the lab<sup>12</sup>. To narrow down the field of search, this approach often requires outside  
563 knowledge of candidate genes, gained from developmental research in related models or other methods of

564 filtering the genome. Furthermore, because these approaches usually lack global measurements of gene ex-  
565 pression variation across species, identifying an expression difference does not always constitute a smoking  
566 gun<sup>6</sup>. For example, observing a difference between candidate gene expression would not be unexpected if we  
567 frequently observe differences of that magnitude between genes chosen at random. An alternative approach,  
568 as demonstrated here, is to characterize all the evolutionary changes in expression across the transcriptome,  
569 and then identify the changes that are significantly associated with traits of interest<sup>9</sup>. As expression data  
570 become available from an ever wider array of species, this “evolutionary screen” approach becomes increas-  
571 ingly possible. One advantage of this approach is that it may reveal associations that would otherwise  
572 escape detection when comparisons are centered on model organisms; for example, when genes, traits, or  
573 processes happen to not be present in our laboratory model species<sup>10</sup>. By leveraging phylogenetic compara-  
574 tive methods on high-dimensional functional genomic data, the objective of connecting genomic variation to  
575 developmental mechanisms and phenotypic differences will be accelerated.

## 576 References

- 577 1. Wang, Z., Gerstein, M. & Snyder, M. RNA-seq: A revolutionary tool for transcriptomics. *Nature Reviews*  
578 *Genetics* **10**, 57–63 (2009).
- 579 2. Ozsolak, F. & Milos, P. M. RNA sequencing: Advances, challenges and opportunities. *Nature Reviews*  
580 *Genetics* **12**, 87–98 (2011).
- 581 3. Van Dijk, E. L., Auger, H., Jaszczyszyn, Y. & Thermes, C. Ten years of next-generation sequencing  
582 technology. *Trends in Genetics* **30**, 418–426 (2014).
- 583 4. McDermaid, A., Monier, B., Zhao, J., Liu, B. & Ma, Q. Interpretation of differential gene expression  
584 results of RNA-seq data: Review and integration. *Briefings in Bioinformatics* **20**, 2044–2054 (2019).
- 585 5. Dunn, C. W., Zapata, F., Munro, C., Siebert, S. & Hejnol, A. Pairwise comparisons across species are  
586 problematic when analyzing functional genomic data. *Proceedings of the National Academy of Sciences* **115**,  
587 E409–E417 (2018).
- 588 6. Church, S. H. & Extavour, C. G. Null hypotheses for developmental evolution. *Development* **147**,  
589 dev178004 (2020).
- 590 7. Dunn, C. W., Luo, X. & Wu, Z. Phylogenetic analysis of gene expression. *Integrative and Comparative*  
591 *Biology* **53**, 847–856 (2013).
- 592 8. Munro, C., Zapata, F., Howison, M., Siebert, S. & Dunn, C. W. Evolution of gene expression across  
593 species and specialized zooids in Siphonophora. *bioRxiv* (2021).
- 594 9. Smith, S. D., Pennell, M. W., Dunn, C. W. & Edwards, S. V. Phylogenetics is the new genetics (for most  
595 of biodiversity). *Trends in Ecology & Evolution* **35**, 415–425 (2020).
- 596 10. Dunn, C. W., Leys, S. P. & Haddock, S. H. The hidden biology of sponges and ctenophores. *Trends in*  
597 *Ecology & Evolution* **30**, 282–291 (2015).
- 598 11. Arias, A. M. *Drosophila melanogaster* and the development of biology in the 20th century. *Drosophila*  
599 **420**, 1–25 (2008).
- 600 12. Jenner, R. A. & Wills, M. A. The choice of model organisms in evo–devo. *Nature Reviews Genetics* **8**,  
601 311–314 (2007).
- 602 13. Yanai, I., Graur, D. & Ophir, R. Incongruent expression profiles between human and mouse orthologous  
603 genes suggest widespread neutral evolution of transcription control. *Omic: a Journal of Integrative Biology*  
604 **8**, 15–24 (2004).
- 605 14. Lin, S. *et al.* Comparison of the transcriptional landscapes between human and mouse tissues. *Proceed-*  
606 *ings of the National Academy of Sciences* **111**, 17224–17229 (2014).
- 607 15. Gilad, Y. & Mizrahi-Man, O. A reanalysis of mouse ENCODE comparative gene expression data.  
608 *F1000Research* **4**, 1–30 (2015).
- 609 16. Liao, B.-Y. & Zhang, J. Evolutionary conservation of expression profiles between human and mouse  
610 orthologous genes. *Molecular Biology and Evolution* **23**, 530–540 (2006).
- 611 17. Cardoso-Moreira, M. *et al.* Gene expression across mammalian organ development. *Nature* **571**, 505–509  
612 (2019).
- 613 18. Fukushima, K. & Pollock, D. D. Amalgamated cross-species transcriptomes reveal organ-specific propen-  
614 sity in gene expression evolution. *Nature Communications* **11**, 1–14 (2020).
- 615 19. Merkin, J., Russell, C., Chen, P. & Burge, C. B. Evolutionary dynamics of gene and isoform regulation  
616 in mammalian tissues. *Science* **338**, 1593–1599 (2012).
- 617 20. Brawand, D. *et al.* The evolution of gene expression levels in mammalian organs. *Nature* **478**, 343–348  
618 (2011).



- 619 21. Breschi, A. *et al.* Gene-specific patterns of expression variation across organs and species. *Genome*  
620 *Biology* **17**, 1–13 (2016).
- 621 22. Robinson, S. W., Herzyk, P., Dow, J. A. & Leader, D. P. FlyAtlas: Database of gene expression in the  
622 tissues of *Drosophila melanogaster*. *Nucleic Acids Research* **41**, D744–D750 (2013).
- 623 23. Graveley, B. R. *et al.* The developmental transcriptome of *Drosophila melanogaster*. *Nature* **471**,  
624 473–479 (2011).
- 625 24. St. Pierre, S. E., Ponting, L., Stefancsik, R., McQuilton, P. & Consortium, F. FlyBase 102—advanced  
626 approaches to interrogating flybase. *Nucleic Acids Research* **42**, D780–D788 (2014).
- 627 25. Chintapalli, V. R., Wang, J. & Dow, J. A. Using flyatlas to identify better *Drosophila melanogaster*  
628 models of human disease. *Nature Genetics* **39**, 715–720 (2007).
- 629 26. Papatheodorou, I. *et al.* Expression atlas: Gene and protein expression across multiple studies and  
630 organisms. *Nucleic Acids Research* **46**, D246–D251 (2018).
- 631 27. Butler, A., Hoffman, P., Smibert, P., Papalexi, E. & Satija, R. Integrating single-cell transcriptomic  
632 data across different conditions, technologies, and species. *Nature Biotechnology* **36**, 411–420 (2018).
- 633 28. Parisi, M. *et al.* A survey of ovary-, testis-, and soma-biased gene expression in *Drosophila melanogaster*  
634 adults. *Genome Biology* **5**, 1–18 (2004).
- 635 29. Leader, D. P., Krause, S. A., Pandit, A., Davies, S. A. & Dow, J. A. T. FlyAtlas 2: A new version of the  
636 *Drosophila melanogaster* expression atlas with RNA-seq, miRNA-seq and sex-specific data. *Nucleic Acids*  
637 *Research* **46**, D809–D815 (2018).
- 638 30. Kumar, T., Blondel, L. & Extavour, C. G. Topology-driven protein-protein interaction network analysis  
639 detects genetic sub-networks regulating reproductive capacity. *Elife* **9**, e54082 (2020).
- 640 31. Kirilly, D. & Xie, T. The *Drosophila* ovary: An active stem cell community. *Cell Research* **17**, 15–25  
641 (2007).
- 642 32. Jagut, M. *et al.* A mosaic genetic screen for genes involved in the early steps of *Drosophila* oogenesis.  
643 *G3: Genes, Genomes, Genetics* **3**, 409–425 (2013).
- 644 33. Barnett, T., Pacht, C., Gergen, J. P. & Wensink, P. C. The isolation and characterization of *Drosophila*  
645 yolk protein genes. *Cell* **21**, 729–738 (1980).
- 646 34. Kugler, J.-M. & Lasko, P. Localization, anchoring and translational control of oskar, gurken, bicoid and  
647 nanos mRNA during *Drosophila* oogenesis. *Fly* **3**, 15–28 (2009).
- 648 35. Stephenson, E. C., Chao, Y.-C. & Fackenthal, J. D. Molecular analysis of the *swallow* gene of *Drosophila*  
649 *melanogaster*. *Genes & development* **2**, 1655–1665 (1988).
- 650 36. O’Grady, P. & DeSalle, R. Hawaiian *Drosophila* as an evolutionary model clade: Days of future past.  
651 *Bioessays* **40**, 1700246 (2018).
- 652 37. Obbard, D. J. *et al.* Estimating divergence dates and substitution rates in the *Drosophila* phylogeny.  
653 *Molecular Biology and Evolution* **29**, 3459–3473 (2012).
- 654 38. Kambysellis, M. P. *et al.* Pattern of ecological shifts in the diversification of Hawaiian *Drosophila* inferred  
655 from a molecular phylogeny. *Current Biology* **5**, 1129–1139 (1995).
- 656 39. Montague, J. R., Mangan, R. L. & Starmer, W. T. Reproductive allocation in the Hawaiian Drosophili-  
657 dae: Egg size and number. *The American Naturalist* **118**, 865–871 (1981).
- 658 40. Sarikaya, D. P. *et al.* Reproductive capacity evolves in response to ecology through common changes in  
659 cell number in Hawaiian *Drosophila*. *Current Biology* **29**, 1877–1884 (2019).
- 660 41. Church, S. H., Donoughe, S., Medeiros, B. A. de & Extavour, C. G. A dataset of egg size and shape  
661 from more than 6,700 insect species. *Scientific Data* **6**, 1–11 (2019).

- 662 42. Church, S. H., Medeiros, B. A. de, Donoughe, S., Márquez Reyes, N. L. & Extavour, C. G. Repeated  
663 loss of variation in insect ovary morphology highlights the role of development in life-history evolution.  
664 *Proceedings of the Royal Society B* **288**, 20210150 (2021).
- 665 43. Edwards, K. A., Doescher, L. T., Kaneshiro, K. Y. & Yamamoto, D. A database of wing diversity in the  
666 Hawaiian *Drosophila*. *PLoS One* **2**, e487 (2007).
- 667 44. Church, S. H. & Extavour, C. G. Phylotranscriptomics reveals discordance in the phylogeny of Hawaiian  
668 *Drosophila* and *Scaptomyza* (Diptera: Drosophilidae). *bioRxiv* (2021).
- 669 45. Magnacca, K. N. & Price, D. K. New species of Hawaiian picture wing *Drosophila* (Diptera: Drosophil-  
670 idae), with a key to species. *Zootaxa* **3188**, 1–30 (2012).
- 671 46. Hardy, D. Review of the Hawaiian *Drosophila* (antopocerus) Hardy [insects]. *Proceedings Entomological*  
672 *Society of Washington* **79**, 82–95 (1977).
- 673 47. Hackman, W. On the genus *Scaptomyza* Hardy (Dipt., Drosophilidae) with descriptions of new species  
674 from various parts of the world. *Acta Zoologica Fennica* **97**, 1–73 (1959).
- 675 48. O’Grady, P., Kam, M., Val, F. do & Perreira, W. Revision of the *Drosophila* *mimica* subgroup, with  
676 descriptions of ten new species. *Annals of the Entomological Society of America* **96**, 12–38 (2003).
- 677 49. Hardy, D. *Diptera: Cyclorrhapha II, Series Schizophora Section Acalypterae I. Family Drosophilidae.*  
678 vol. 12 (University of Hawai’i Press, 1965).
- 679 50. O’Grady, P. M. *et al.* Phylogenetic and ecological relationships of the Hawaiian *Drosophila* inferred by  
680 mitochondrial DNA analysis. *Molecular Phylogenetics and Evolution* **58**, 244–256 (2011).
- 681 51. Lapoint, R. T., Magnacca, K. N. & O’Grady, P. M. Phylogenetics of the Antopocerus-Modified Tarsus  
682 clade of Hawaiian *Drosophila*: Diversification across the Hawaiian islands. *PLoS One* **9**, e113227 (2014).
- 683 52. Katoh, T., Izumitani, H. F., Yamashita, S. & Watada, M. Multiple origins of Hawaiian drosophilids:  
684 Phylogeography of *Scaptomyza* *hardy* (Diptera: Drosophilidae). *Entomological Science* **20**, 33–44 (2017).
- 685 53. Katoh, K. & Standley, D. M. MAFFT multiple sequence alignment software version 7: Improvements in  
686 performance and usability. *Molecular Biology and Evolution* **30**, 772–780 (2013).
- 687 54. Stamatakis, A. RAxML version 8: A tool for phylogenetic analysis and post-analysis of large phylogenies.  
688 *Bioinformatics* **30**, 1312–1313 (2014).
- 689 55. Dunn, C. W., Howison, M. & Zapata, F. Agalma: An automated phylogenomics workflow. *BMC*  
690 *Bioinformatics* **14**, 1–9 (2013).
- 691 56. Li, B. & Dewey, C. N. RSEM: Accurate transcript quantification from RNA-seq data with or without a  
692 reference genome. *BMC Bioinformatics* **12**, 1–16 (2011).
- 693 57. Boussau, B. *et al.* Genome-scale coestimation of species and gene trees. *Genome Research* **23**, 323–330  
694 (2013).
- 695 58. Freedman, A. H., Clamp, M. & Sackton, T. B. Error, noise and bias in de novo transcriptome assemblies.  
696 *Molecular Ecology Resources* **21**, 18–29 (2021).
- 697 59. Tung Ho, L. si & Ané, C. A linear-time algorithm for gaussian and non-gaussian trait evolution models.  
698 *Systematic Biology* **63**, 397–408 (2014).
- 699 60. McLaughlin, J. M. & Bratu, D. P. *Drosophila melanogaster* oogenesis: An Overview. *Methods in*  
700 *molecular biology (Clifton, NJ)* **1328**, 1–20 (2015).
- 701 61. Hoshino, M., Suzuki, E., Nabeshima, Y.-i. & Hama, C. Hikaru genki protein is secreted into synaptic  
702 clefts from an early stage of synapse formation in *Drosophila*. *Development* **122**, 589–597 (1996).
- 703 62. Garabedian, M. J., Shepherd, B. M. & Wensink, P. C. A tissue-specific transcription enhancer from the  
704 *Drosophila* yolk protein 1 gene. *Cell* **45**, 859–867 (1986).

- 705 63. Larkin, A. *et al.* FlyBase: Updates to the *Drosophila melanogaster* knowledge base. *Nucleic Acids*  
706 *Research* **49**, D899–D907 (2021).
- 707 64. Consortium, T. M. & others. Single-cell transcriptomics of 20 mouse organs creates a *Tabula Muris*.  
708 *Nature* **562**, 367–372 (2018).
- 709 65. Quake, S. R., Consortium, T. S. & others. The *Tabula Sapiens*: A single cell transcriptomic atlas of  
710 multiple organs from individual human donors. *BioRxiv* (2021).
- 711 66. Tanay, A. & Sebé-Pedrós, A. Evolutionary cell type mapping with single-cell genomics. *Trends in*  
712 *Genetics* **37**, (2021).
